# Supplementary material
Source: publisher figshare collection journal article supplement (https://gsajournals.figshare.com/ndownloader/files/26450996)
Supplement: Supplementary file 1 [file 26450996]

**Figure S2: Altered gene expression at insulated neighborhoods in cohesin variant mESCs, Related to Figure 3.**

1. RT-qPCR analysis of genes at five insulated neighborhoods in *Stag2-/-* and *Smc1aR816G* mESCs. The inside gene (teal) and outside gene (orange) for each SD are adjacent to each other, and the log2 fold change value is indicated for the five insulated neighborhoods in each cell line. n=3 biological replicates. Significance was determined by Dunnet’s multiple comparisons test; *p<0.05.
2. RT-qPCR analysis of genes at five insulated neighborhoods in *Smc1aR586W* and matched wildtype mESC clones. The inside gene (teal) and outside gene (orange) for each SD are adjacent to each other, and the log2 fold change value is indicated for the five insulated neighborhoods in each cell line. n=3 biological replicates. Significance was determined by Dunnet’s multiple comparisons test; *p<0.05.
